# Supplementary material for: In situ synthesized one-dimensional porous Ni@C nanorods as catalysts for hydrogen storage properties of MgH2
Source: Royal Society of Chemistry journal article supplement (doi:10.1039/c3nr05607d), 2014-01-01
Supplement: c3nr05607d.pdf [file c3nr05607d.pdf]

Electronic Supplementary Information for

**In-situ synthesized one-dimensional porous Ni@C nanorods as catalysts for hydrogen storage properties of MgH<sub>2</sub>**

Cuihua An, Guang Liu, Li Li, Ying Wang, Chengcheng Chen, Yijing Wang, Lifang Jiao, Huatang Yuan

*Institute of New Energy Material Chemistry, Key Laboratory of Advanced Energy Materials Chemistry (MOE), Collaborative Innovation Center of Chemical Science and Engineering (Tianjin), Tianjin Key Lab on Metal and Molecule-based Material Chemistry, Nankai University, Tianjin 300071, P.R. China*

Email address: wangyj@nankai.edu.cn

**Supplementary Figures**

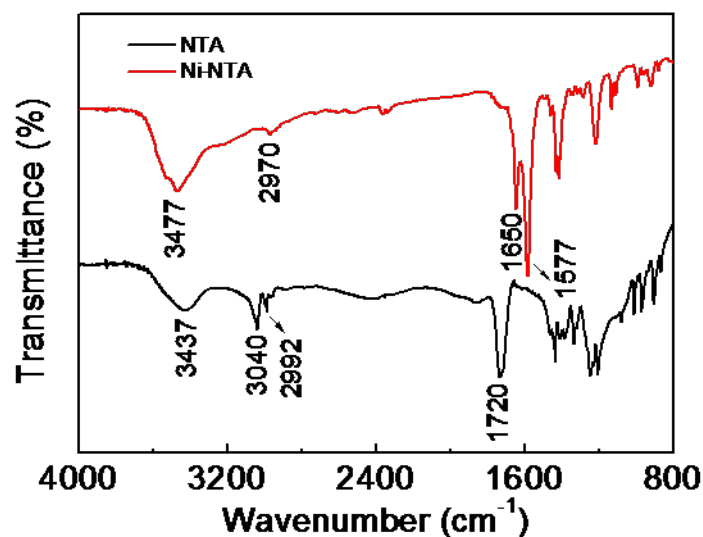

**Fig.S1** Fourier transform infrared spectra of pure NTA and Ni-NTA precursor.

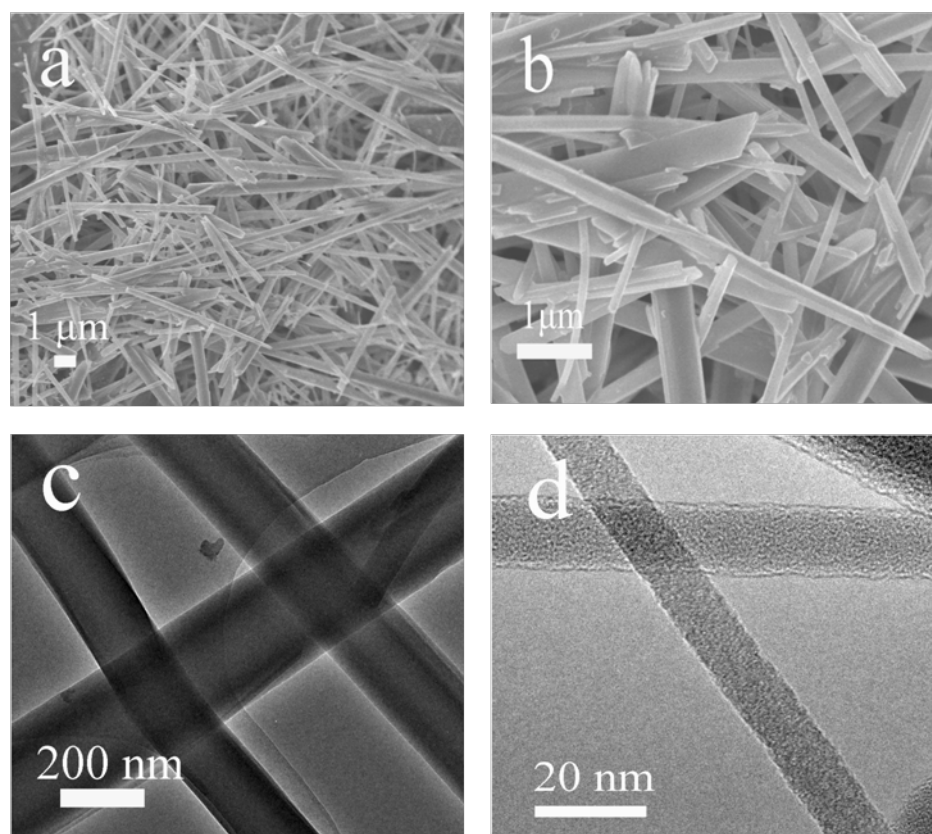

**Fig.S2** FESEM images (a-b) and TEM images (c-d) of the Ni-NTA precursor with different magnification.

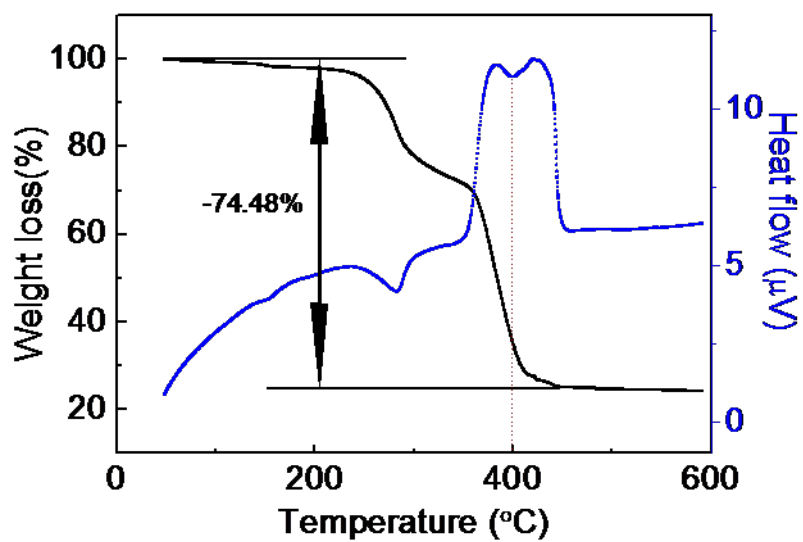

**Fig.S3** The thermogravimetric analysis and different thermal analysis (TG-DTA) curve of the Ni-NTA precursor.

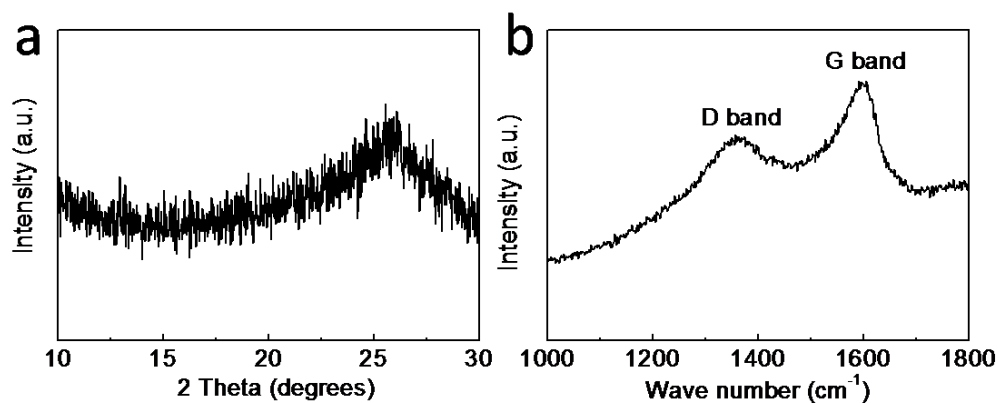

**Fig.S4** (a) XPD pattern, (b) Raman spectrum of the obtained Ni@C composite.

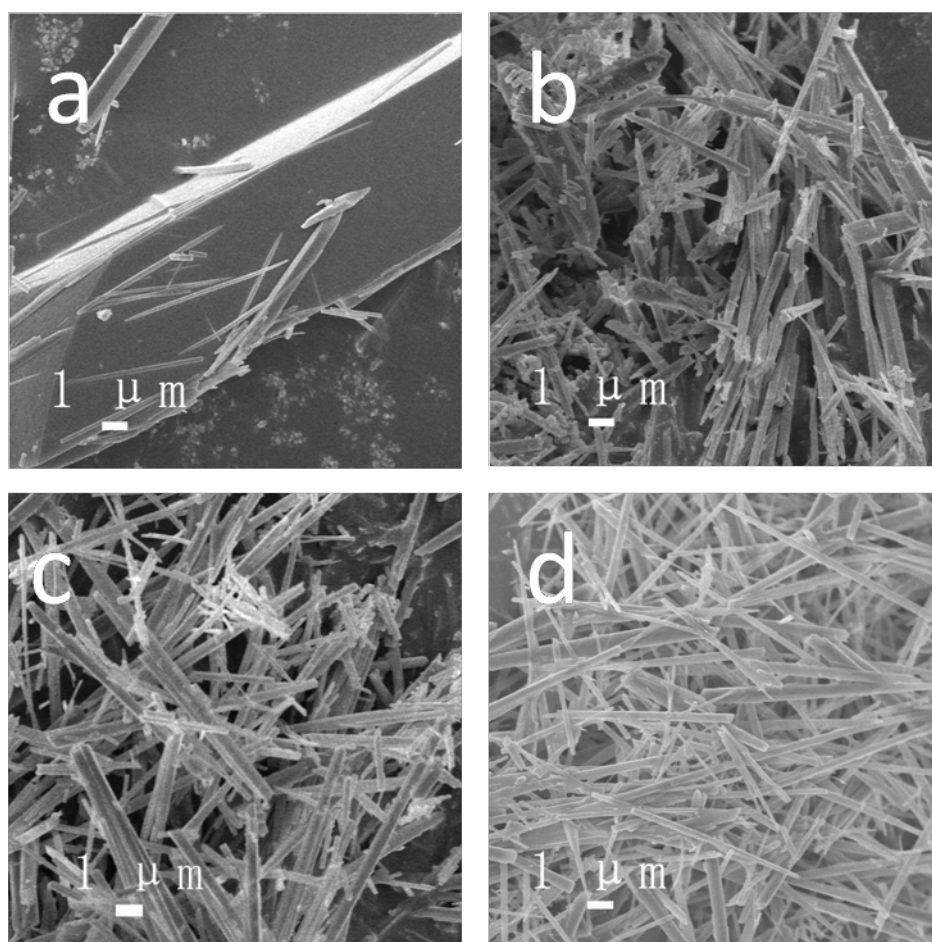

**Fig.S5** SEM images of the precursors prepared with different reaction times of 1 h (a), 2 h (b), 4 h (c) and 6 h (d).

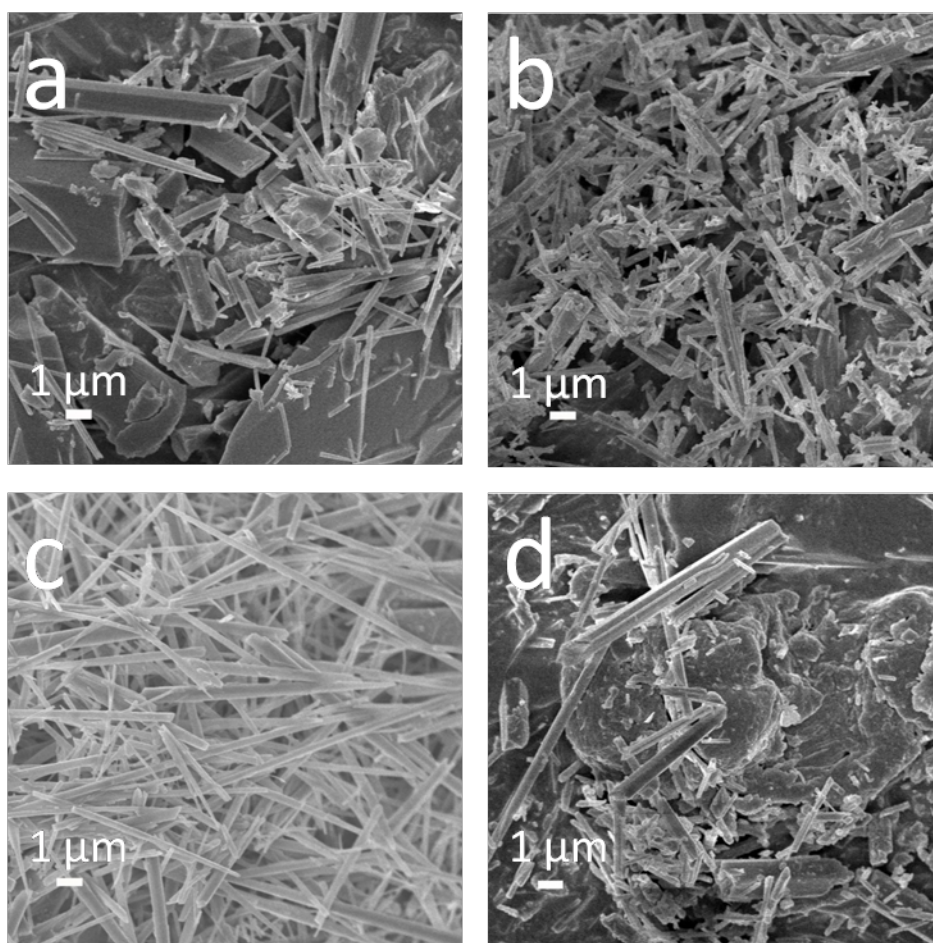

**Fig.S6** SEM images of the precursors obtained at (a) 140 °C, (b) 160 °C, (c) 180 °C and (d) 200 °C.

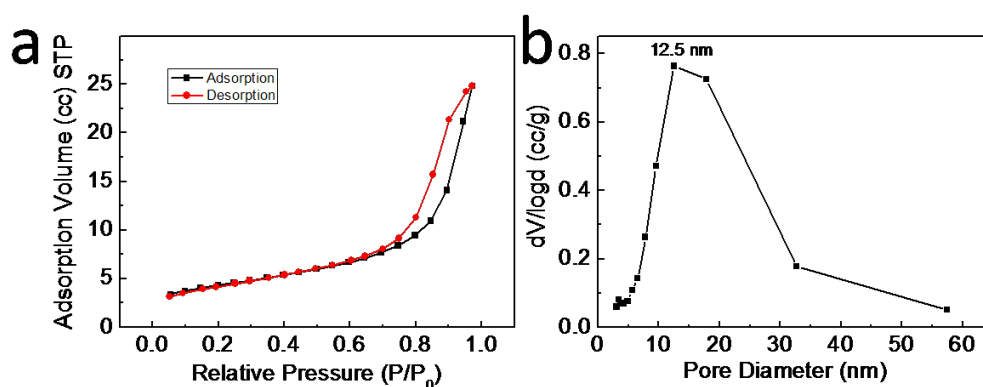

**Fig.S7** Nitrogen adsorption and desorption isotherms (a) and its corresponding pore size distribution curves (b) of the as-prepared Ni@C composite.

Table S1 Decomposition peak temperature of MgH<sub>2</sub>-5wt%Ni@C composites determined by DSC

| Heating rate (°C) | DSC (°C) |
|-------------------|----------|
| 2                 | 282.1    |
| 5                 | 306      |
| 10                | 325.1    |
| 20                | 342.3    |
